# Supplementary material for: Boundary conditions of an active West Antarctic subglacial lake: implications for storage of water beneath the ice sheet
Source: Copernicus journal article supplement (doi:10.5194/tc-8-15-2014), 2014-01-03
Supplement: Supplementary file 1 [file Supplementary Video caption.docx]

# Supplementary Video.

Rotating 3-D view showing the relation between the location of the location of subglacial lake Institute E2 and surrounding subglacial topography.
